# Supplementary material
Source: publisher figshare collection journal article supplement (https://karger.figshare.com/articles/dataset/_/21378003)
Supplement: Supplementary file 1 [file 1]

| Table 4S. Relative abundance of microbial species by caries experience, dorsum of tongue | | | | |
| --- | --- | --- | --- | --- |
| Species | Caries free  Median TPC (LQ, UQ)d | 1-2 carious lesions  Median TPC (LQ, UQ) | 3+ carious lesions  Median TPC (LQ, UQ) | Overall  Median TPC (LQ, UQ) |
| *Ac. israelii* | 2.5 (1.5, 3.4) | 2.5 (1.4, 3.2) | 2.4 (1.5, 3.3) | 2.4 (1.4, 3.4) |
| *Ac. naeslundii* | **3.0 (2.0, 4.0)** | **2.8 (1.7, 3.9)** | **3.3 (2.2, 4.5)a** | 3.0 (1.9, 4.1) |
| *V. parvula* | **4.4 (1.8, 6.0)** | **4.3 (2.1, 6.0)** | **3.5 (1.6, 5.3)a** | 4.1 (1.8, 6.0) |
| *S. gordonii* | 2.3 (1.6, 3.1) | 2.4 (1.7, 3.1) | 2.2 (1.4, 3.2) | 2.3 (1.5, 3.1) |
| *S. intermedius* | 2.7 (1.9, 3.5) | 2.6 (1.8, 3.6) | 2.7 (1.8, 3.7) | 2.7 (1.8, 3.5) |
| *S. mitis* I | 3.2 (2.0, 4.2) | 3.1 (2.1, 4.1) | 3.0 (1.9, 4.3) | 3.1 (2.0, 4.2) |
| *S. mitis* II | 3.4 (2.1, 4.3) | 3.3 (2.3, 4.3) | 3.4 (2.3, 4.3) | 3.4 (2.2, 4.3) |
| *S. oralis* | 2.4 (1.5, 3.3) | 2.4 (1.3, 3.3) | 2.3 (1.4, 3.4) | 2.4 (1.4, 3.3) |
| *A. actinomycetemcomitans* | 3.9 (2.8, 4.9) | 3.9 (2.9, 5.0) | 3.8 (2.7, 4.9) | 3.9 (2.8, 4.9) |
| *Cap. gingivalis* | 5.2 (4.1, 6.7) | 5.1 (3.9, 7.0) | 5.2 (4.1, 7.0) | 5.2 (4.1, 6.8) |
| *E. corrodens* | 4.2 (3.2, 5.3) | 4.1 (3.0, 5.0) | 4.2 (3.1, 5.2) | 4.2 (3.1, 5.1) |
| *C. rectus* | 3.8 (2.8, 4.5) | 3.8 (2.8, 4.4) | 3.8 (3.0, 4.6) | 3.8 (2.8,4.5) |
| *Pr. nigrescens/intermedia* | 5.3 (4.3, 6.8) | 5.2 (4.2, 6.7) | 5.4 (4.3, 6.8) | 5.3 (4.3, 6.8) |
| *M. micros* | 2.3 (1.3, 3.2) | 2.1 (1.1, 3.2) | 2.3 (1.3, 3.3) | 2.2 (1.2, 3.2) |
| *P. gingivalis* | 1.5 (1.0, 2.6) | 1.6 (0.9, 2.7) | 1.4 (0.8, 2.7) | 1.5 (0.9, 2.7) |
| *T. forsythia* | 3.9 (2.7, 5.1) | 4.1 (2.8, 5.2) | 4.2 (3.1, 5.2) | 4.0 (2.8, 5.2) |
| *Tr. denticola* | 3.8 (2.9, 4.7) | 3.7 (2.8, 4.6) | 3.7 (2.6, 4.5) | 3.7 (2.8, 4.6) |
| *C. matruchotii* | 0.9 (0.5, 2.2) | 0.9 (0.5, 2.0) | 1.0 (0.6, 2.0) | 0.9 (0.5, 2.1) |
| *G. morbillorum* | 3.8 (2.9, 5.0) | 3.6 (2.6, 5.2) | 3.6 (2.6, 4.9) | 3.7 (2.8, 5.0) |
| *H. parainfluenzae* | 1.1 (0.6, 2.0) | 1.3 (0.6, 2.3) | 1.1 (0.5, 2.1) | 1.2 (0.6, 2.1) |
| *L. fermentum* | 1.9 (1.2, 2.8) | 1.9 (1.0, 2.9) | 2.2 (1.3, 3.0) | 2.0 (1.1, 2.9) |
| *L. rhamnosus* | 2.8 (1.6, 3.8) | 2.8 (1.7, 4.0) | 2.9 (1.7, 3.8) | 2.8 (1.7, 3.9) |
| *L. plantarum* | 2.7 (1.3, 3.8) | 2.8 (1.6, 3.7) | 2.8 (1.5, 3.8) | 2.8 (1.5, 3.8) |
| *Lep. buccalis* | 4.9 (3.8, 6.6) | 5.1 (3.8, 6.9) | 5.3 (3.8, 6.7) | 5.1 (3.8, 6.6) |
| *Pep. asaccharolyticus* | 5.6 (4.0, 7.8) | 5.6 (3.9, 8.1) | 5.6 (4.1, 7.5) | 5.6 (4.0, 7.8) |
| *R. dentocariosa* | 2.2 (1.2, 3.2) | 2.2 (1.1, 3.2) | 2.2 (1.3, 3.2) | 2.2 (1.2, 3.2) |
| *Sel. noxia* | 1.5 (0.6, 2.8) | 1.2 (0.6, 2.7) | 1.0 (0.6, 2.5) | 1.3 (0.6, 2.7) |
| *S. mutans* | 2.5 (1.3, 4.5) | 2.5 (1.4, 4.3) | 2.3 (1.3, 4.2) | 2.4 (1.3, 4.4) |
| *S. sobrinus* | 1.3 (0.7, 2.4) | 1.4 (0.7, 2.4) | 1.3 (0.7, 2.3) | 2.4 (1.3, 2.4) |
| *S. vestibularis* | 4.2 (3.2, 5.2) | 4.1 (3.1, 5.3) | 4.0 (3.2, 5.1) | 4.1 (3.1, 5.2) |

a P<0.05, b P<0.01, c P<0.001 d %TPC=percent total probe count, LQ=lower quartile, UQ=upper quartile
